# Supplementary material for: CXCR2 affects radiosensitization of HPV-negative head and neck squamous cell carcinoma cells by ABT-263
Source: Research Square preprint supplement (doi:10.21203/rs.3.rs-7956226/v1), 2025-11-17
Supplement: Supplementary file 1 [file 06858abc96f090b7f74dd830.xlsx]

## Sheet: S Table 1
	Supplementary Table 1. Cell seeding
	Experiment		Cell line	Seeding
	Transfection		UPCI:SCC040, Cal33	1,5x105 cells/6well (1,56x104 cells/cm2)
	Viability alamarBlue™		UPCI:SCC040, Cal33	1000 cells/96well
	Annexin V assay		UPCI:SCC040, Cal33	5.2 - 10.4 x 104 cells/cm2 (0/6 Gy)
	Senescence assay		UPCI:SCC040, Cal33	16.4 - 27.4 x 104 cells / cm2 (0/6 Gy)
	qRTPCR		UPCI:SCC040, Cal33	8.3 or 10.4x103 cells/cm2 for Day 4 (0 or 6 Gy)
			UPCI:SCC040, Cal33	6.25 or 10.4 x 103 cells/cm2 for Day 6 (0 or 6 Gy)
	Western Blot (10 cm petri dishes)		UPCI:SCC040, Cal33	12.75 or 17 x 103 cells/cm2 for Day 4 (0 or 6 Gy)
			UPCI:SCC040, Cal33	8.5 or 17 x 103 cells/cm2 for Day 6 (0 or 6 Gy)
	DSB repair detection		UPCI:SCC040, Cal33	30 000 cells (15 mm glass coverslips in 12well)
	CFA	PE (ABT-263)	UPCI:SCC040, Cal33	300/600 (0-7/8-10 µM ABT-263)
		+ DMSO	UPCI:SCC040	150/150/300/800 (0/2/4/6 Gy) cells/6well
		+ 5/6 µM ABT-263	UPCI:SCC040	200/250/550/1 500 (0/2/4/6 Gy) cells/6well
		+ DMSO/1 µM ABT-263	Cal33	150, 300, 600 cells/cm2 in 10 cm petri dish
		+ siRNA + DMSO	UPCI:SCC040	150/200/600/1 500 (0/2/4/6 Gy) cells/6well
		+ siRNA + 1 µM ABT-263	UPCI:SCC040	200/400/1 000/2 500 (0/2/4/6 Gy) cells/6well
		+ siRNA + 5 µM ABT-263	UPCI:SCC040	400/800/1 000/2 500 (0/2/4/6 Gy) cells/6well

## Sheet: S Table 2
	Supplementary Table 2. siRNA purchased from Dharmacon (ON-Targetplus, SMARTpool; Horizon Discovery Group, Cambridge, UK).
	siRNA	Reference	Sequence 5‘-3‘
	ON-TARGETplus Human CXCR2 siRNA - SMARTpool siRNA Mix; stock 100 μM	J-005647-05	UCUAAGACCUCCUGCCUAA
		J-005647-06	GAAGGACCGUCUACUCAUC
		J-005647-07	CCUCAAGAUUCUAGCUAUA
		J-005647-08	GAGGACAUGGGCAACAAUA
	ON-TARGETplus Human - Non-targeting Control Pool; stock 100 μM	D-001810-01	UGGUUUACAUGUCGACUAA
		D-001810-02	UGGUUUACAUGUUUUCUGA
		D-001810-03	UGGUUUACAUGUUGUGUGA
		D-001810-04	UGGUUUACAUGUUUUCCUA
	Additional information	Cellseeding	1,5x105 cells/6well (1,56x104 cells/cm2)
		Lipofectamine 2000	5 µl Lipofectamine 2000 /well
		siRNA concentration	100 nM
		Incubation time Transfection	4 h

## Sheet: S Table 3
	Supplementary Table 3. Primer list
	Target gene	Direction	Sequence 5’- 3’
	ALAS	forward	TCCACTGCAGCAGTACACTACCA
	ALAS	reverse	ACGGAAGCTGTGTGCCATCT
	BAX	forward	TGATGGACGGGTCCGGG
	BAX	reverse	CAAAAGGGCCCCTGTCTTCA
	BCL2	forward	CCTGGATCCAGGATAACGGAGG
	BCL2	reverse	GAAATCAAACAGAGGCCGCA
	BCL2L2 TV1(Bcl-W)	forward	AGCTCCTGCACCAGGAAAC
	BCL2L2 TV1(Bcl-W)	reverse	GCCAGCTCCACAGACATAAC
	BCL2L2 TV2(Bcl-W)	forward	GACCCGTGAGATCCCTAACCT
	BCL2L2 TV2(Bcl-W)	reverse	TGGGGCCTTTCATCCTCCT
	BCL2L1 (Bcl-XL)	forward	GGCCACTTACCTGAATGACC
	BCL2L1 (Bcl-XL)	reverse	AAGAGTGAGCCCAGCAGAAC
	CXCL1	forward	TTGCCTCAATCCTGCATCCC
	CXCL1	reverse	GGTCAGTTGGATTTGTCACTGT
	CXCL2	forward	GAAAGCTTGTCTCAACCCCG
	CXCL2	reverse	TGGTCAGTTGGATTTGCCATTTT
	CXCL5	forward	CAGACCACGCAAGGAGTTCA
	CXCL5	reverse	TCTTCAGGGAGGCTACCACT
	CXCL7	forward	TGAACTCCGCTGCATGTGTA
	CXCL7	reverse	CAGTGTGGCTATCACTTCGACT
	CXCR2	forward	CAGCGACCCAGTCAGGATTT
	CXCR2	reverse	TCAAAGCTGTCACTCTCCATGT
	IL1A	forward	GCTTCCTGAGCAATGTGAAATACA
	IL1A	reverse	CAAATTTCACTGCTTCATCCAGATT
	IL1B	forward	CCTGAGCTCGCCAGTGAAAT
	IL1B	reverse	TTTAGGGCCATCAGCTTCAAA
	IL6	forward	GGTACATCCTCGACGGCATCT
	IL6	reverse	AGTGCCTCTTTGCTGCTTTCAC
	IL8	forward	TGGCAGCCTTCCTGATTTCT
	IL8	reverse	TGCACTGACATCTAAGTTCTTTAGCA

## Sheet: S Table 4
	Supplementary Table 4. Antibodies
	Primary antibodies	Source	Dilution	Company	Item no.	RRID
	Bax	rabbit	1:1000	Cell Signaling Technology, Danvers, Massachusetts, USA	#2774	AB_490806
	BCL-XL	rabbit	1:2000		#2764	AB_2228008
	h Caspase 9 specific	rabbit	1:1000		#9502	AB_2068621
	GAPDH (14C10)	rabbit	1:3000		#2118	AB_561053
	Lamin B1	mouse	1:1000	SantaCruz Biotechnology, Inc., Santa Cruz, CA, USA	sc-374015	AB_10947408
	β-Actin AC15	mouse	1:1000		sc-69879	AB_1119529
	Secondary antibodies
	Anti-mouse IgG-HRP	goat	1:5000	Millipore Corp, Darmstadt, Germany	#AP308P	AB_92635
	Anti-rabbit IgG-HRP	goat	1:5000		#AP132P	AB_90264

## Sheet: S Table 5
	Supplementary Table 5. T test statistics for expression of SASP factors
	UPCI:SCC040
	D4	IL1A	IL1B	IL6	IL8	CXCL1	CXCL2	CXCL5	CXCL7	CXCR2
	DMSO 0 Gy / DMSO 6 Gy	5.3306e-08	8.56283e-06	0.000166638	0.00279551	1.65559e-05	0.00034684	1.10737e-07	0.00668307	1.65559e-05
	ABT-263 0 Gy / ABT-263 6 Gy	0.000197244	0.00512287	0.000174821	0.0281701	2.75014e-05	3.10189e-06	0.237315		2.75014e-05
	DMSO 0 Gy / ABT-263 0 Gy	3.31167e-06	0.00131675	4.31267e-06	1.728e-07	3.51668e-07	2.03531e-06	0.66581		3.51668e-07
	DMSO 6 Gy / ABT-263 6 Gy	0.041503	0.248674	0.000404036	0.000266306	2.30335e-05	0.0163712	8.10659e-05	0.00746045	2.30335e-05
	D6	IL1A	IL1B	IL6	IL8	CXCL1	CXCL2	CXCL5	CXCL7	CXCR2
	DMSO 0 Gy / DMSO 6 Gy	2.03083e-09	8.80319e-06	0.000480458	0.0109961	0.022829	3.49452e-08	0.00445248	0.00182362	0.022829
	ABT-263 0 Gy / ABT-263 6 Gy	0.39067	0.00144794	0.000262843	1.74972e-05	0.000132441	4.17339e-09	0.65105		0.000132441
	DMSO 0 Gy / ABT-263 0 Gy	8.62828e-07	1.51511e-11	7.09136e-10	4.85644e-07	7.36422e-07	2.16131e-05	2.48077e-07		7.36422e-07
	DMSO 6 Gy / ABT-263 6 Gy	6.16843e-07	2.31192e-05	4.53861e-05	0.670523	0.00122873	4.58358e-07	0.000954059	0.00667641	0.00122873
	Cal33
	D4	IL1A	IL1B	IL6	IL8	CXCL1	CXCL2	CXCL5	CXCL7	CXCR2
	DMSO 0 Gy / DMSO 6 Gy	6.57645e-08	8.46253e-06	7.57228e-10	4.71288e-06	0.000181506	1.40939e-05	0.00180367		0.00933659
	ABT-263 0 Gy / ABT-263 6 Gy	3.39191e-06	1.09652e-06	6.80164e-05	0.00233552	0.00450159	4.62114e-06	0.298156		0.922624
	DMSO 0 Gy / ABT-263 0 Gy	2.74676e-08	0.000100348	1.6961e-06	1.17239e-07	9.1231e-06	4.34253e-06	0.00807223		5.01769e-09
	DMSO 6 Gy / ABT-263 6 Gy	3.32419e-05	9.97489e-06	0.253221	0.00195152	0.360053	0.0675589	0.856684		4.73911e-07
	D6	IL1A	IL1B	IL6	IL8	CXCL1	CXCL2	CXCL5	CXCL7	CXCR2
	DMSO 0 Gy / DMSO 6 Gy	1.52751e-06	4.76545e-08	0.000120064	0.000220669	0.61829	0.0233301	6.96352e-05		1.17942e-05
	ABT-263 0 Gy / ABT-263 6 Gy	0.00157399	0.141411	0.000264456	2.12429e-05	0.674051	0.0835608	0.561953		0.00482538
	DMSO 0 Gy / ABT-263 0 Gy	6.52089e-08	1.31631e-08	1.73006e-05	1.8517e-06	1.02218e-07	2.34655e-06	0.0579114		3.55421e-11
	DMSO 6 Gy / ABT-263 6 Gy	0.0366035	2.65455e-06	0.00532682	0.0178148	0.0125144	0.00350117	0.000173668		0.347762
	regulation:	up	down	no change
